# Supplementary material
Source: Research Square preprint supplement (doi:10.21203/rs.3.rs-9695018/v1)
Supplement: Supplementary file 1 [file 9e895aefcf6d78336dbf4e28.pdf]

21st May, 2026

To

The Editor-In-Chief  
Water Resources Management  
Springer Nature

**SUBMISSION OF A MANUSCRIPT FOR THE EVALUATION AND PUBLICATION IN  
YOUR REPUTED JOURNAL**

Dear Sir/Ma,

I am enclosing herewith a manuscript research article entitled “Development of Spatial and Attribute Database” for possible evaluation and publication in “Water Resources Management of Springer Nature”.

With the submission of this manuscript, I would like to undertake that:

- All authors of this research paper have directly participated in the planning, execution, or analysis of this study;
- All authors of this paper have read and approved the final version submitted;
- The contents of this manuscript have not been copyrighted or published previously;
- The contents of this manuscript are not now under consideration for publication elsewhere;
- The contents of this manuscript will not be copyrighted, submitted, or published elsewhere, while acceptance by the Journal is under consideration;
- There are no directly related manuscripts or abstracts, published or unpublished, by any authors of this paper;
- I have no conflicts of interest to disclose and the authors declare no competing interest;
- I have no funding from any private or public organization for this research;

The Corresponding author of this manuscript is Ajibero Kayode Olayemi and the contribution of authors is as mentioned below with their responsibilities in the research. Detail of each author with his contribution to this paper is as presented:

| Name of the authors and e-mail ID                 | Types of contribution            |
|---------------------------------------------------|----------------------------------|
| Ajibero Kayode Olayemi (ajiberopenniel@gmail.com) | Main Author/Corresponding Author |
| Adesogan Sunday Olufemi (soadesogan@yahoo.com)    | Ph.D. Supervisor                 |
| Omonona O. Victor omonona.victor3@gmail.com)      | Research Reviewer                |
| Efemena O.O. (onomeefe1@yahoo.com)                | Co-Researcher                    |
| Ojo O.T. (ojood@run.edu.ng)                       | Co-Researcher                    |

The present work was completed during the “the year 2023/2024” period as a part of my “Ph.D. thesis. The work was done under the supervision of “Engr (Dr) S.O. Adesogan” working at “Department of Civil Engineering, University of Ibadan Oyo State Nigeria”. The project was self-sponsored. An integrated online dam database set up for the evaluation of dam data with a view to monitor the susceptibility of the dam to failure was the significant findings of this article. If you feel that the manuscript is appropriate for your journal, we suggest the following reviewers.

Waiting for your positive reply.

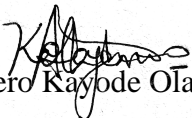  
Ajibero Kayode Olayemi
